# Supplementary material for: Microbial translocation is a cause of systemic immune activation in chronic HIV infection
Source: Springer Nature journal article supplement (doi:10.1038/nm1511), 2006-11-19
Supplement: 41591_2006_BFnm1511_MOESM1_ESM.pdf [file 41591_2006_BFnm1511_MOESM1_ESM.pdf]

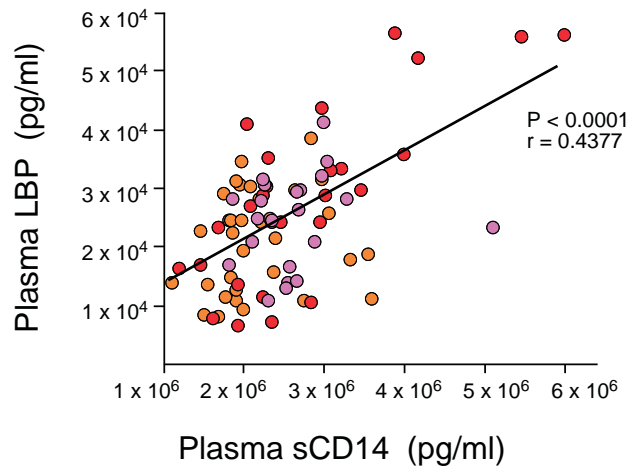

**Supplementary Figure 1** Plasma LBP and sCD14 levels. Correlation between plasma levels of sCD14 and LBP levels in cohorts of acute/early and chronically infected individuals, and individuals with AIDS. Spearman's rank test was used to determine the correlation.
