# Supplementary material for: Microbial translocation is a cause of systemic immune activation in chronic HIV infection
Source: Springer Nature journal article supplement (doi:10.1038/nm1511), 2006-11-19
Supplement: 41591_2006_BFnm1511_MOESM2_ESM.pdf [file 41591_2006_BFnm1511_MOESM2_ESM.pdf]

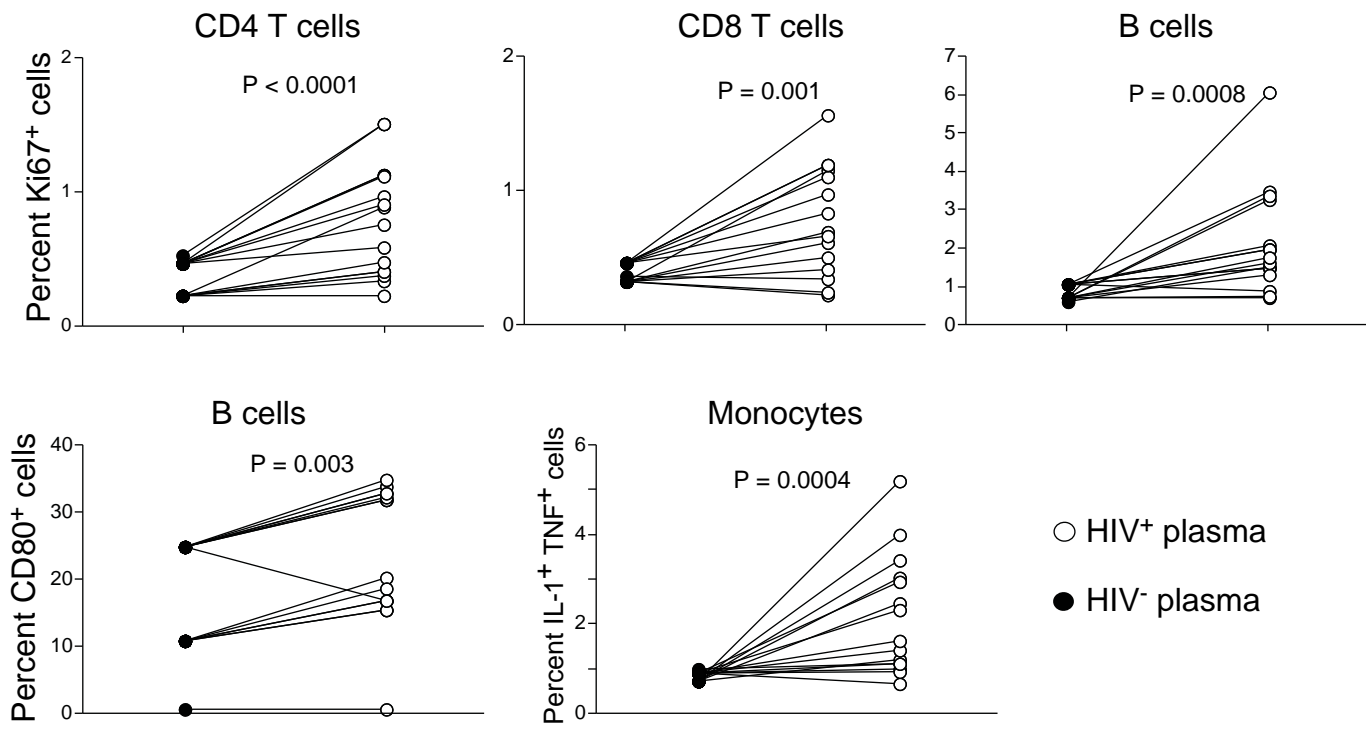

**Supplementary Figure 2** Stimulation of PBMC from uninfected individuals with plasma from HIV-infected and uninfected individuals. PBMC from HIV-uninfected individuals were cultured with 25% heat inactivated plasma from uninfected or HIV-infected individuals for 3 days for T and B cell activation or overnight for monocyte activation followed by staining for relevant activation markers as shown. Wilcoxon's matched pairs test was used to determine statistical differences.
