# Supplementary material for: Microbial translocation is a cause of systemic immune activation in chronic HIV infection
Source: Springer Nature journal article supplement (doi:10.1038/nm1511), 2006-11-19
Supplement: 41591_2006_BFnm1511_MOESM3_ESM.pdf [file 41591_2006_BFnm1511_MOESM3_ESM.pdf]

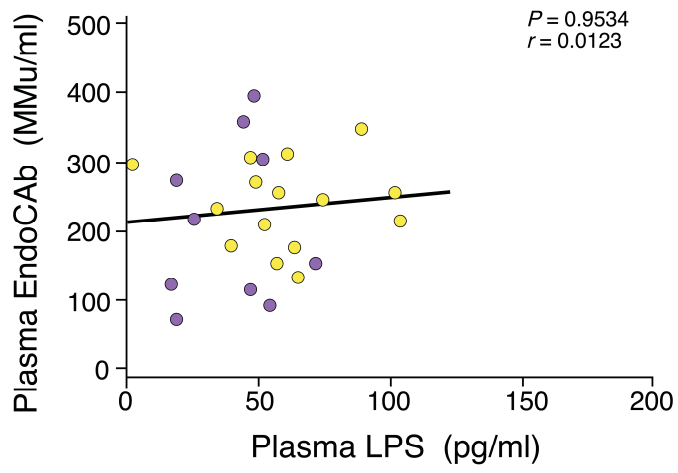

**Supplementary Figure 3** EndoCAb and plasma LPS in controllers. Correlation between plasma levels of IgM EndoCAb and LPS levels in HIV-infected controllers. Spearman's rank test was used to determine the correlation.
